# Supplementary material for: Facile synthesis of mixed O, S or Se bearing hexasubstituted benzenes and their potential as Cu(ii) ion probe
Source: Royal Society of Chemistry journal article supplement (doi:10.1039/c9dt00465c), 2019-01-01
Supplement: c9dt00465c1.pdf [file c9dt00465c1.pdf]

## Electronic Supplementary Information

### Facile Synthesis of Mixed O, S or Se Substituted Hexabenzenes and Their Potential as Cu(II) ion Probe

Abhishek Kumar,<sup>a</sup> Mantesh K. Yadav,<sup>a</sup> Jagriti Singh,<sup>a</sup> Jai Deo Singh,<sup>\*a</sup> and Ray J. Butcher<sup>b</sup>

<sup>a</sup>Department of Chemistry, Indian Institute of Technology(IITD), Hauz Khas, New Delhi-110016, INDIA

<sup>b</sup>Department of Chemistry, Howard University, Washington D.C.-20059, USA

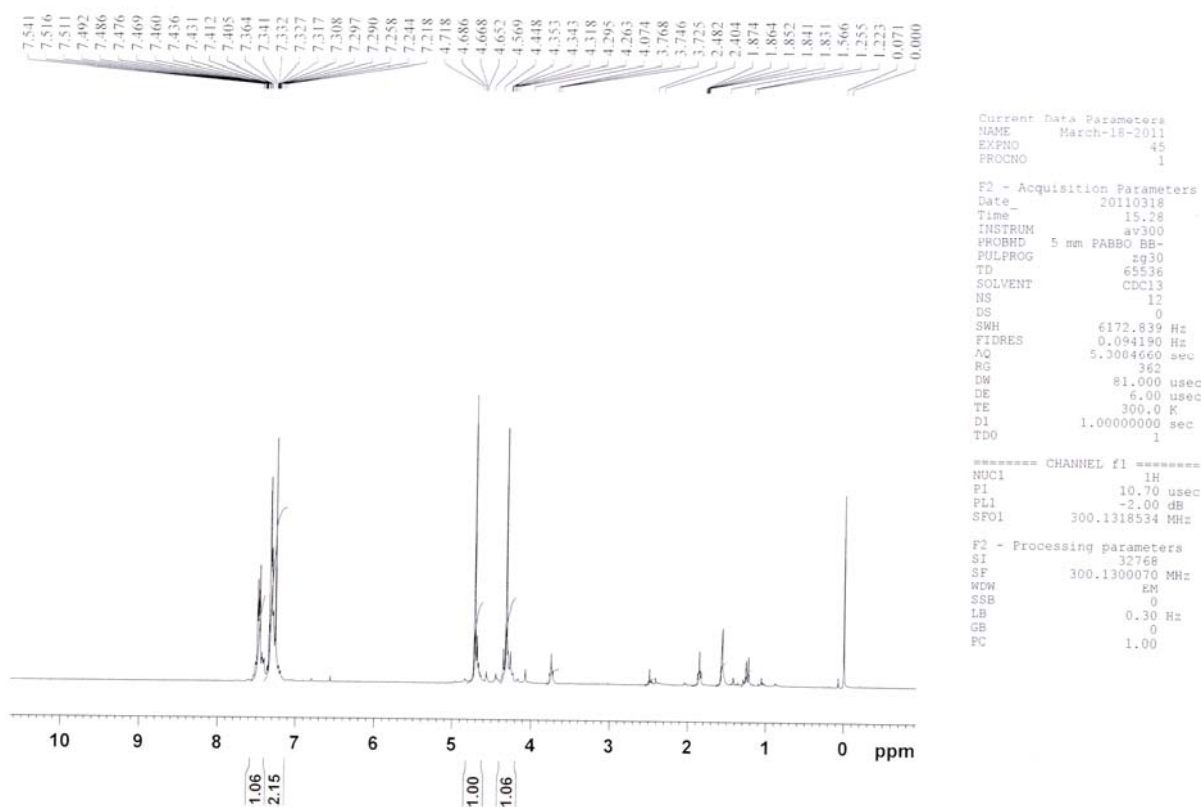

**Fig. S1** <sup>1</sup>H NMR spectrum of **2a** in CDCl<sub>3</sub>

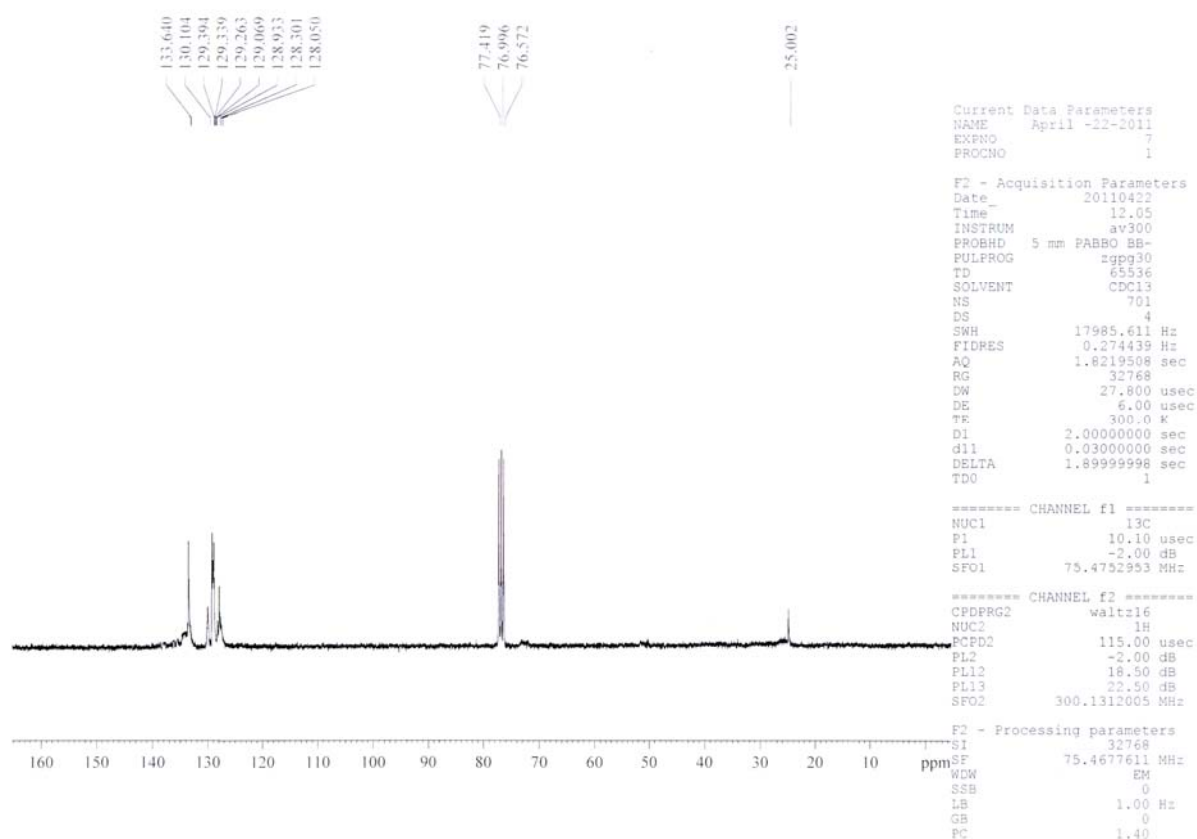

**Fig. S2**  $^{13}\text{C}[^1\text{H}]$  NMR spectrum of **2a** in  $\text{CDCl}_3$

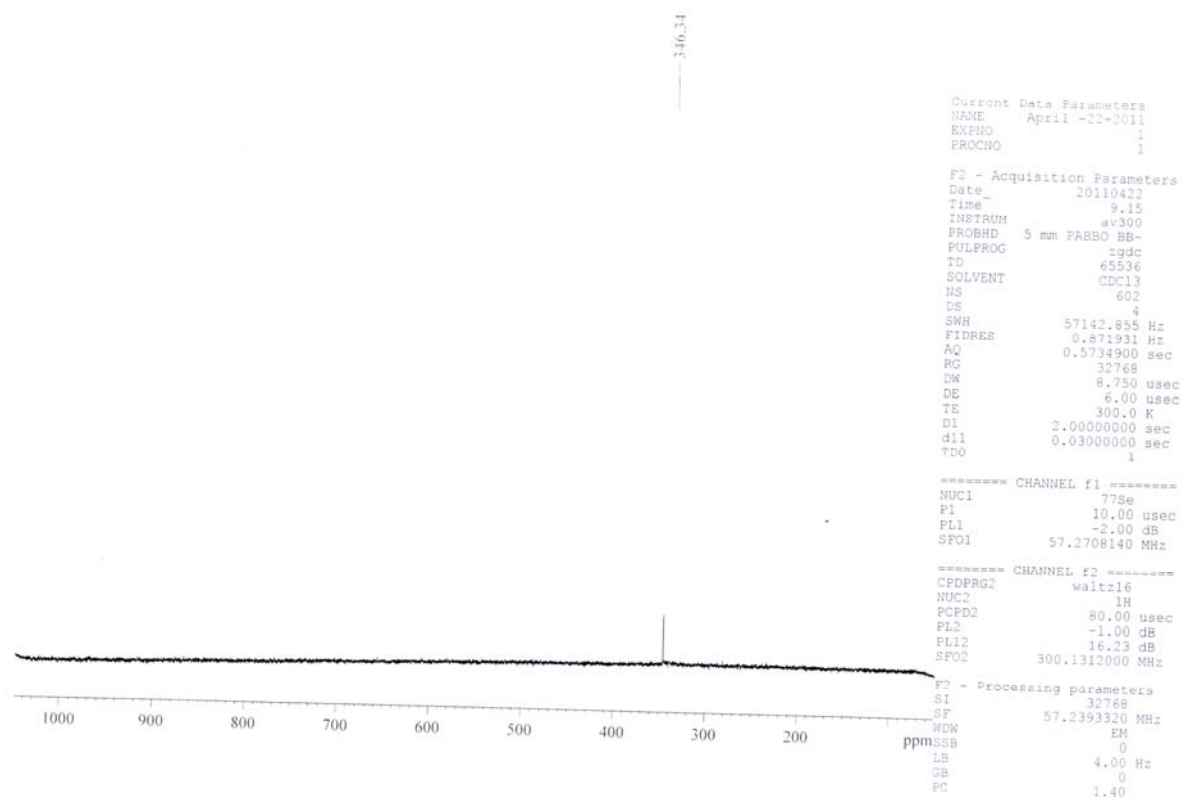

**Fig. S3**  $^{77}\text{Se}$  NMR spectrum of **2a** in  $\text{CDCl}_3$



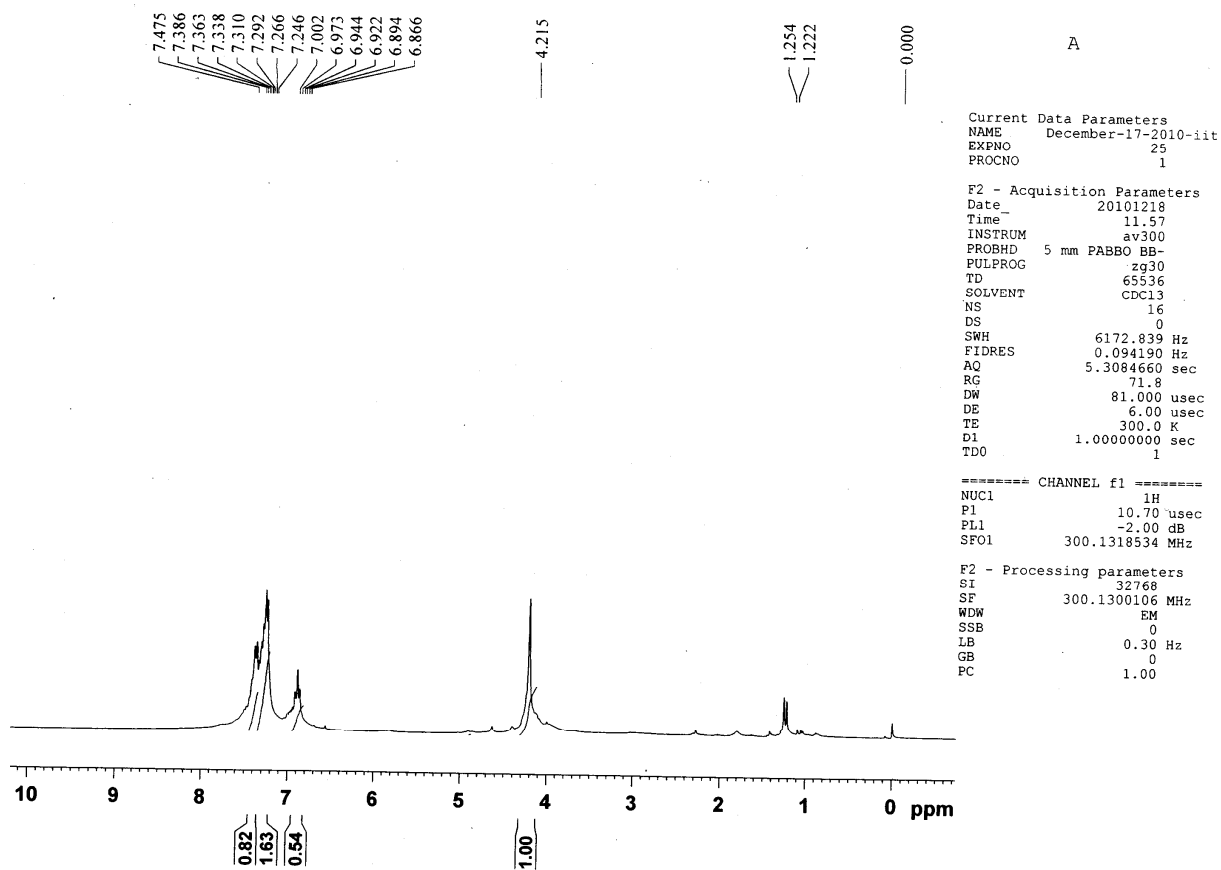

Fig. S5  $^1\text{H}$  NMR spectrum of **3a** in  $\text{CDCl}_3$

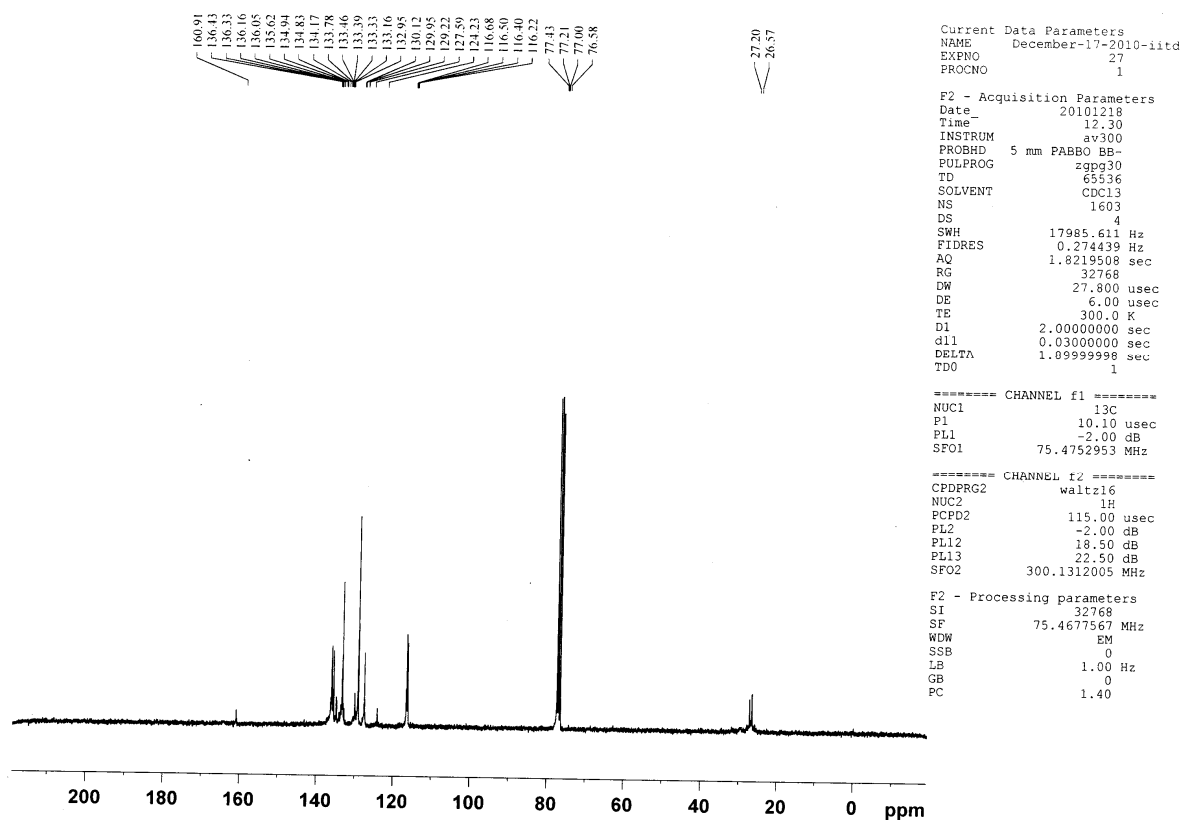

Fig. S6  $^{13}\text{C}$  [ $^1\text{H}$ ] NMR spectrum of **3a** in  $\text{CDCl}_3$

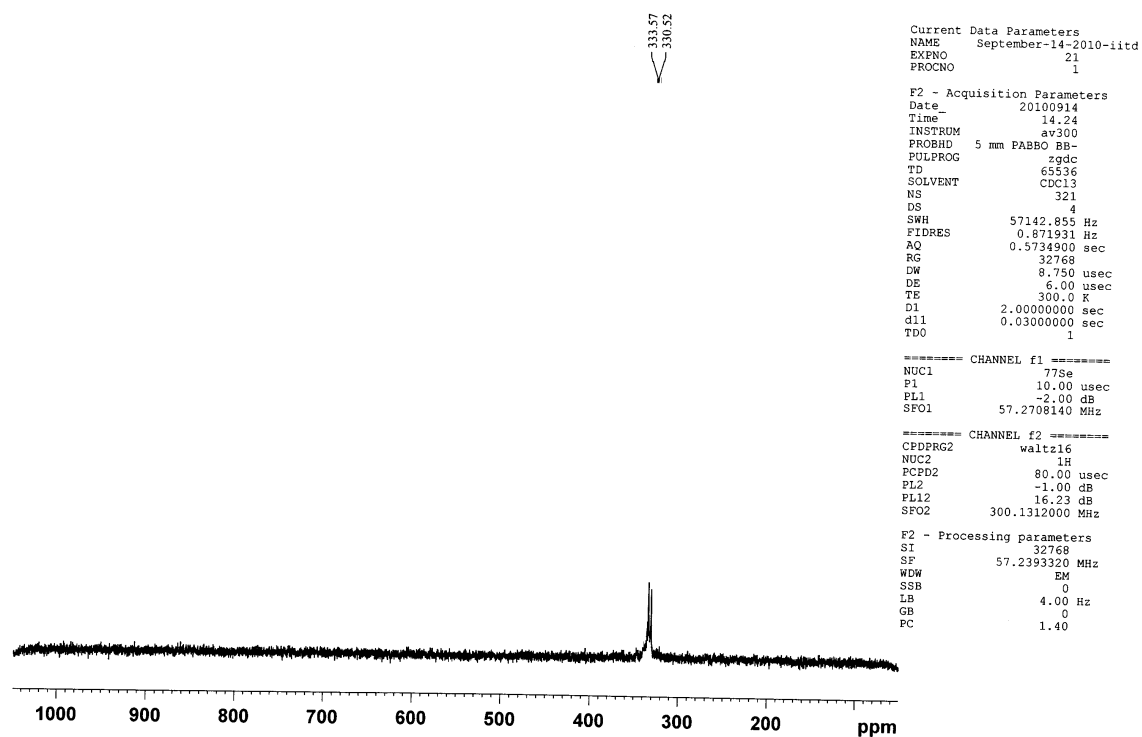

**Fig. S7**  $^{77}\text{Se}$  NMR spectrum of **3a** in  $\text{CDCl}_3$

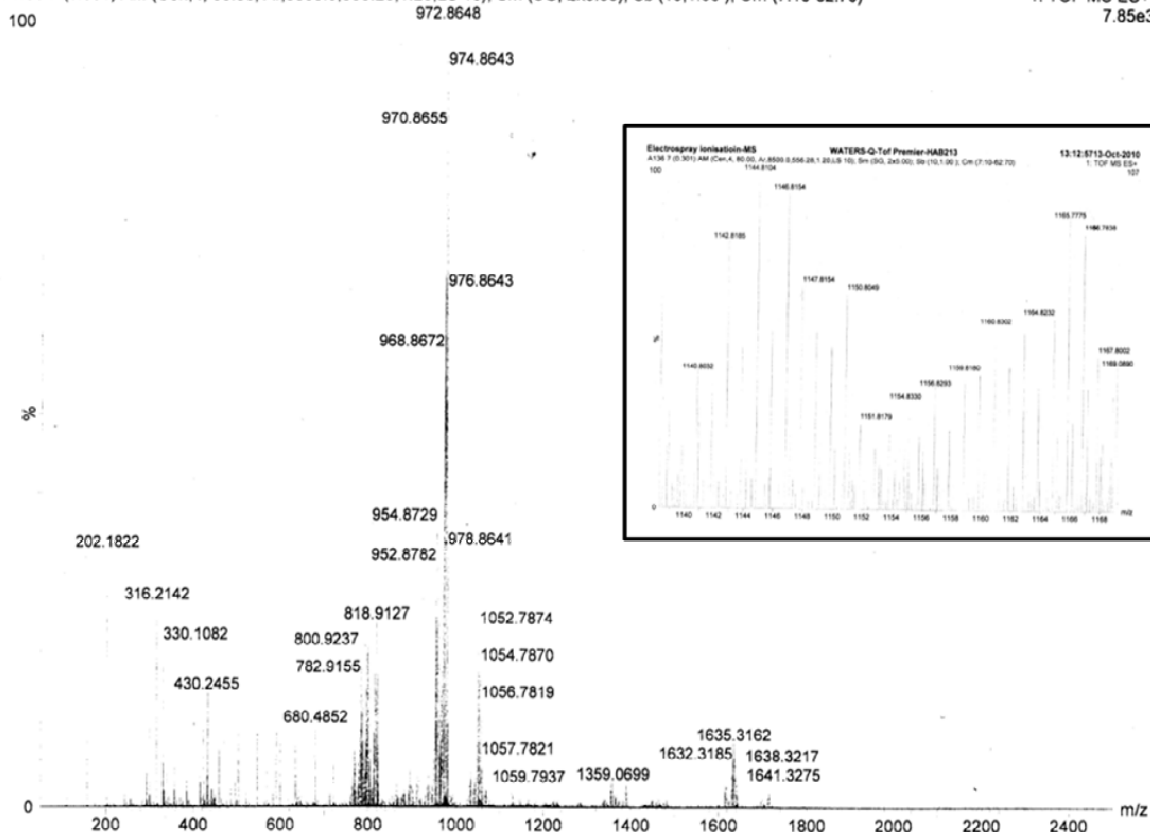

**Fig. S8** ES-MS spectrum of **3a** (Inset: Expanded portion showing molecular ion peak)

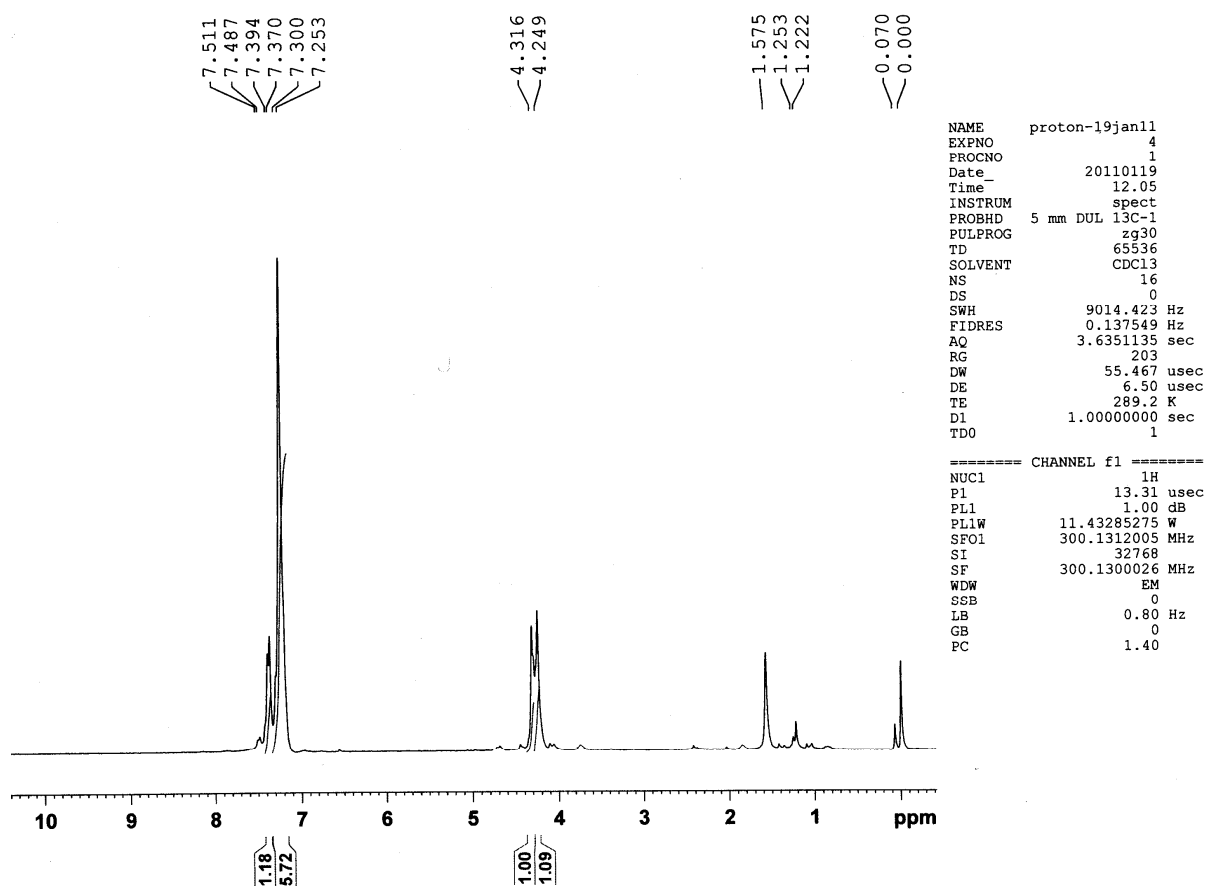

Fig. S9  $^1\text{H}$  NMR spectrum of **4a** in  $\text{CDCl}_3$

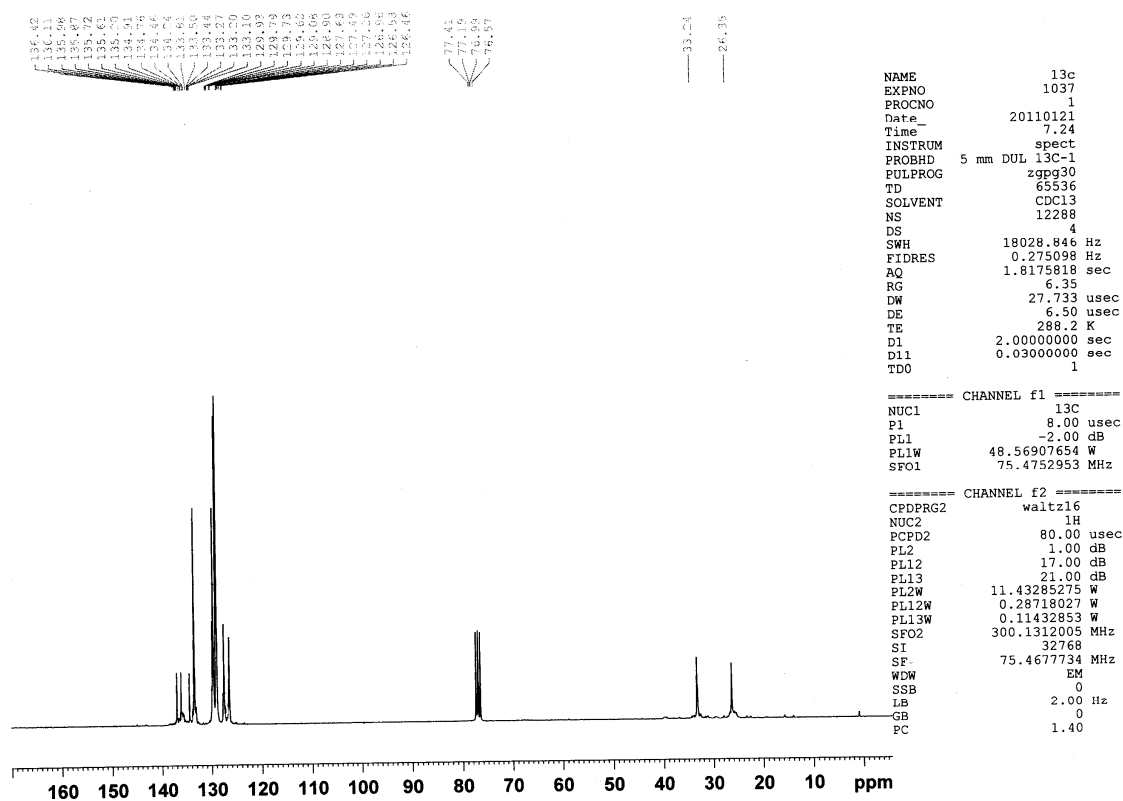

Fig. S10  $^{13}\text{C}$  [ $^1\text{H}$ ] NMR spectrum of **4a** in  $\text{CDCl}_3$

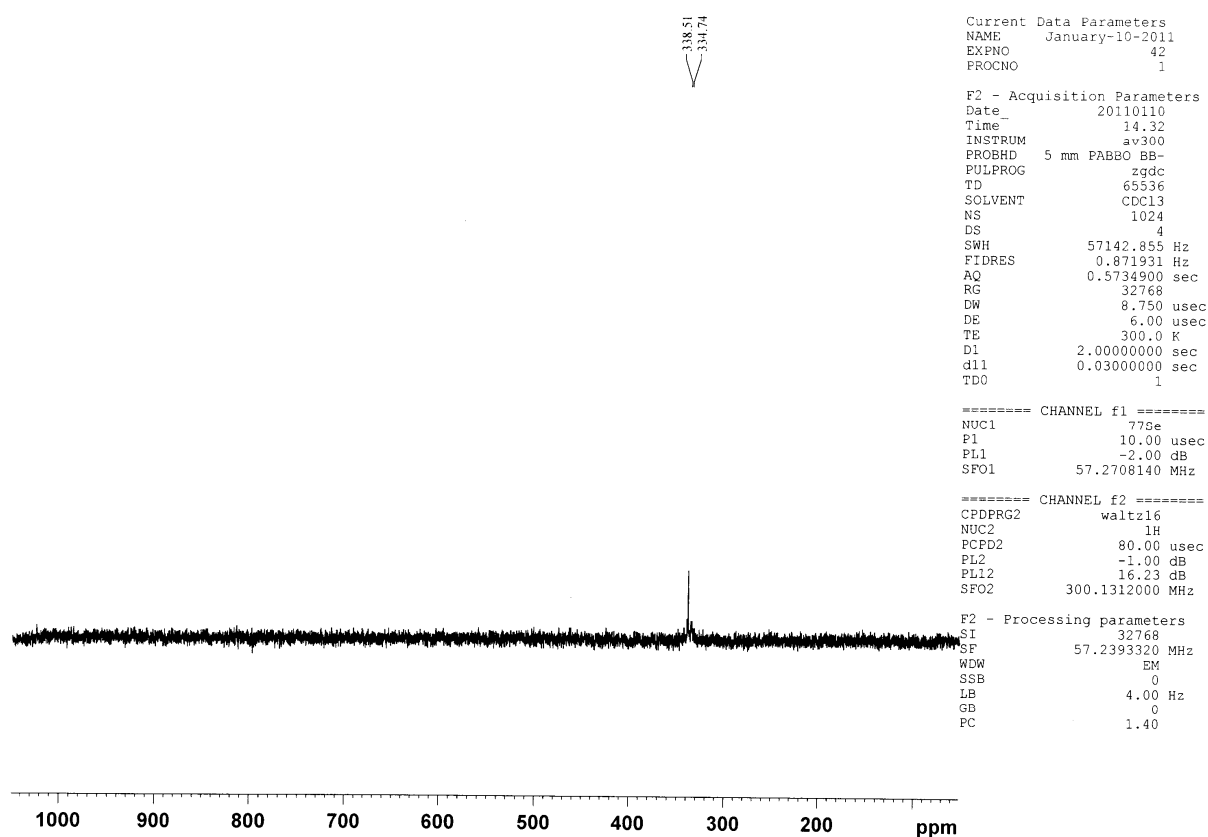

**Fig. S11**  $^{77}\text{Se}$  NMR spectrum of **4a** in  $\text{CDCl}_3$

## Electrospray ionisation-MS

A139 12 (0.259) AM (Cen,4, 80.00, Ar,8500.0,556.28,1.00,LS 10); Sm (SG, 2x5.00); Sb (10,1.00); Cm (8:30-89:116)  
514.1946

## WATERS-Q-ToF Premier-HAB213

14:54:4018-Jan-2011

1: TOF MS ES+  
2.57e4

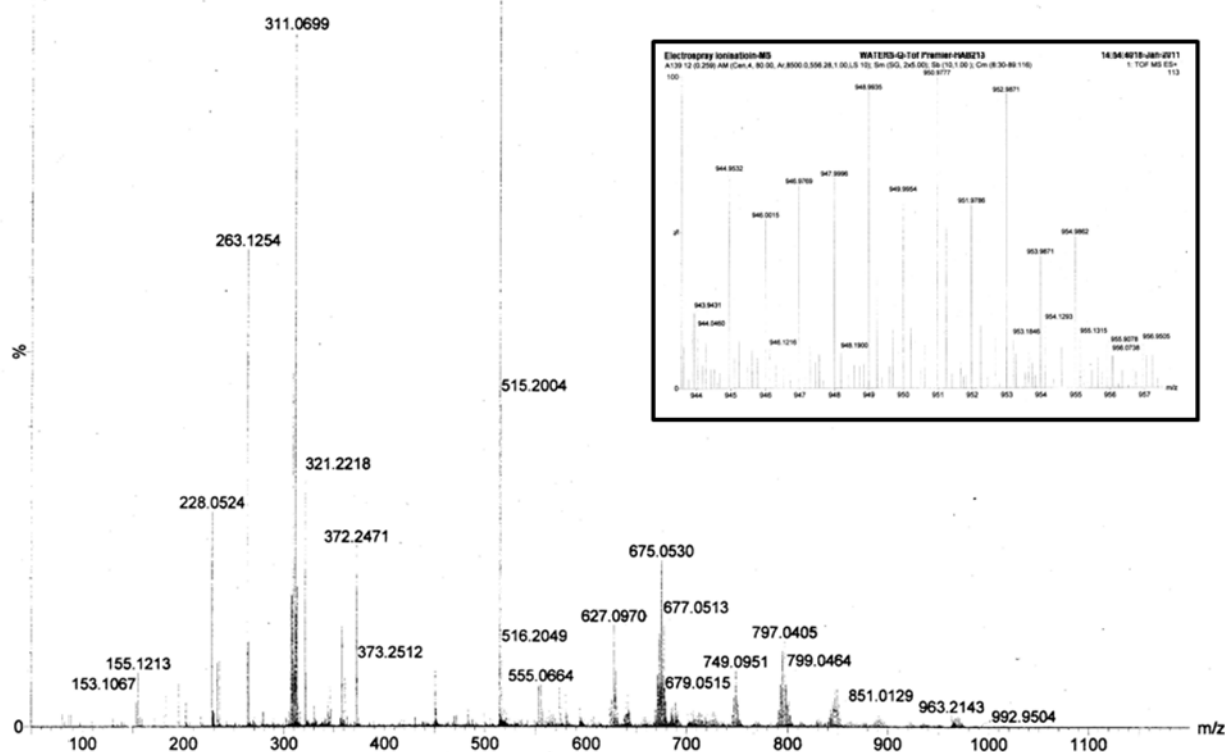

Fig. S12 ES-MS spectrum of **4a** (Inset: Expanded portion showing molecular ion peak)

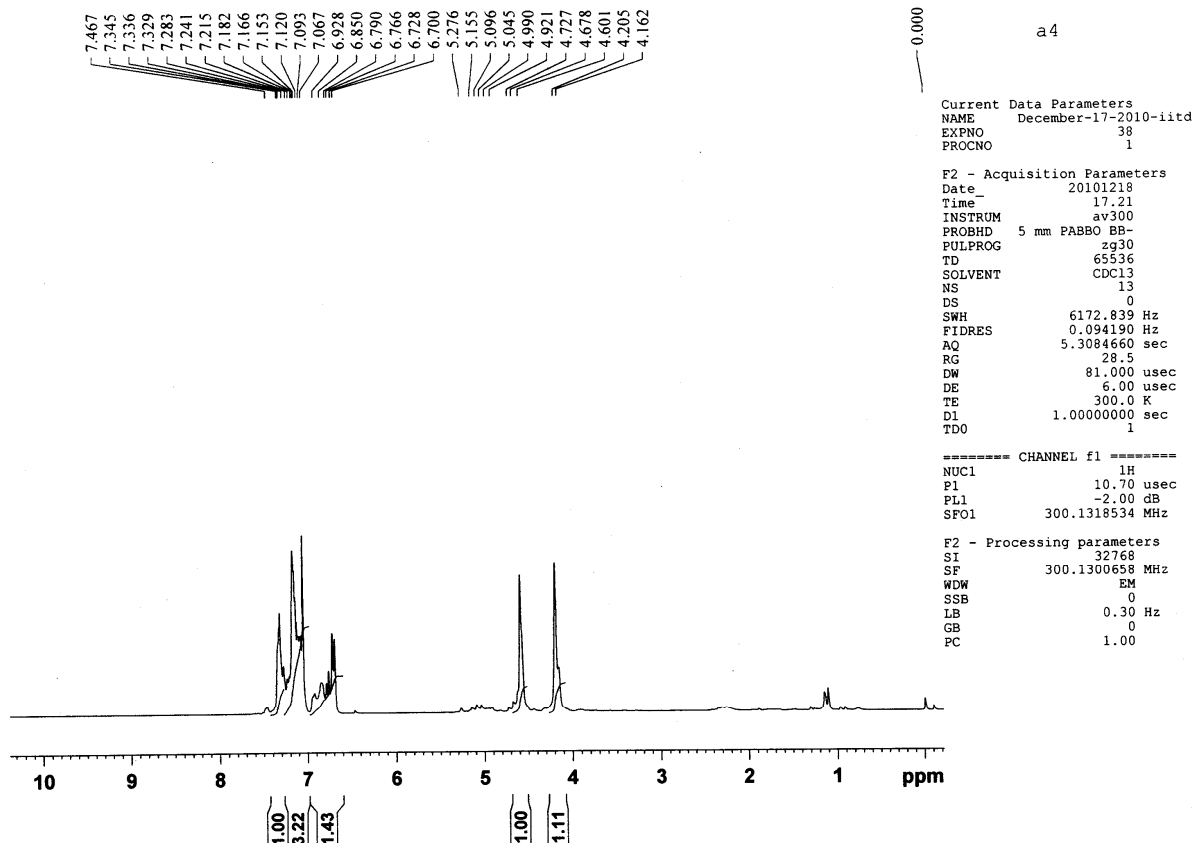

Fig. S13  $^1\text{H}$  NMR spectrum of **5a** in  $\text{CDCl}_3$

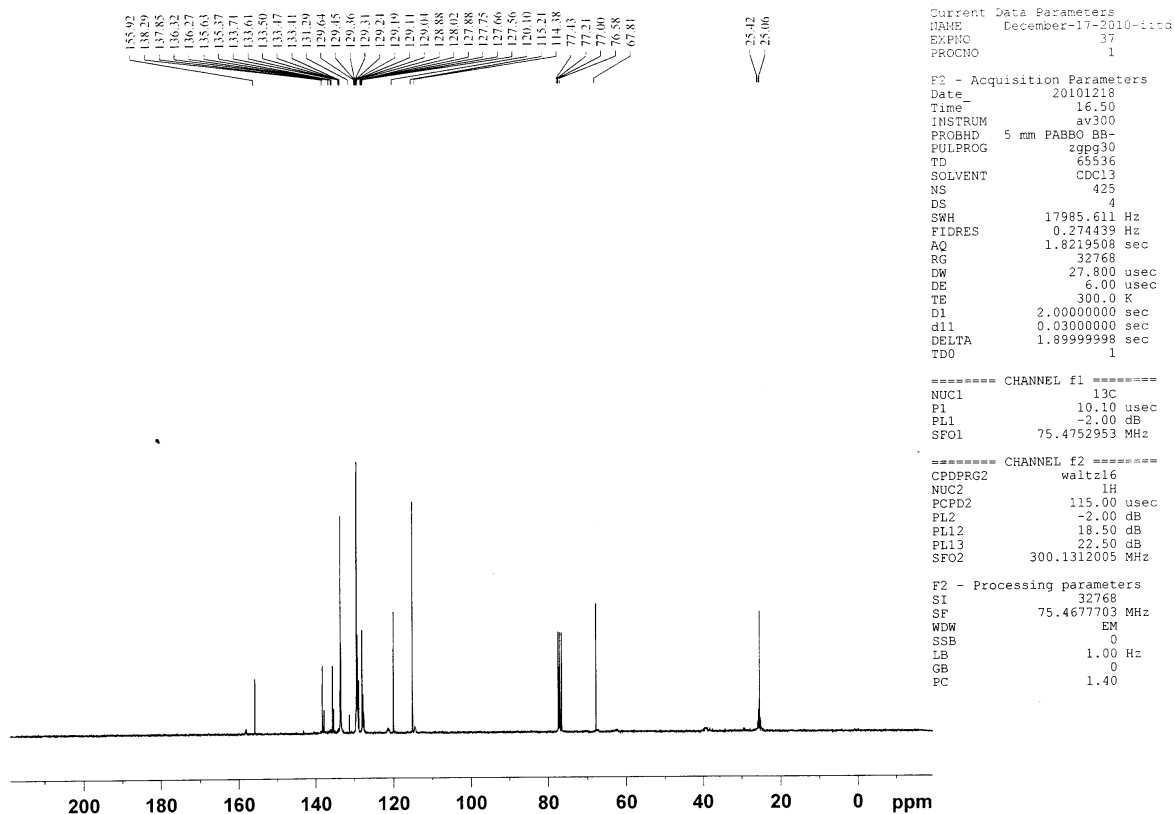

Fig. S14  $^{13}\text{C}[^1\text{H}]$  NMR spectrum of **5a** in  $\text{CDCl}_3$

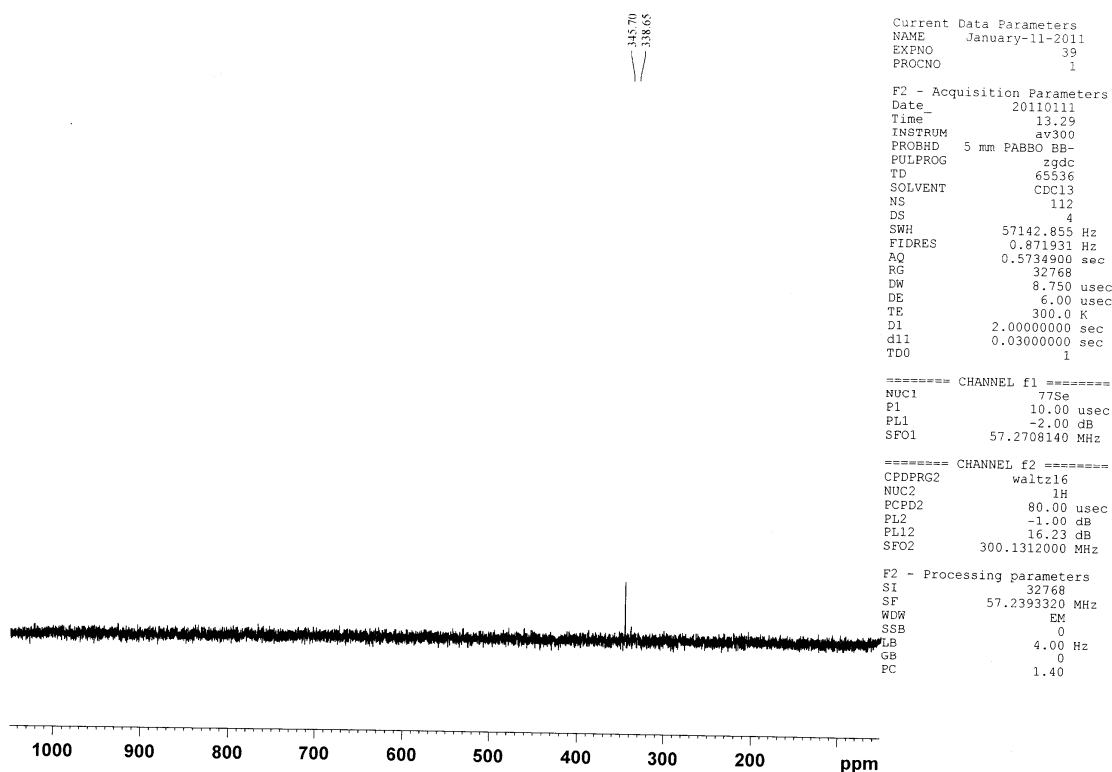

Fig. S15  $^{77}\text{Se}$  NMR spectrum of **5a** in  $\text{CDCl}_3$

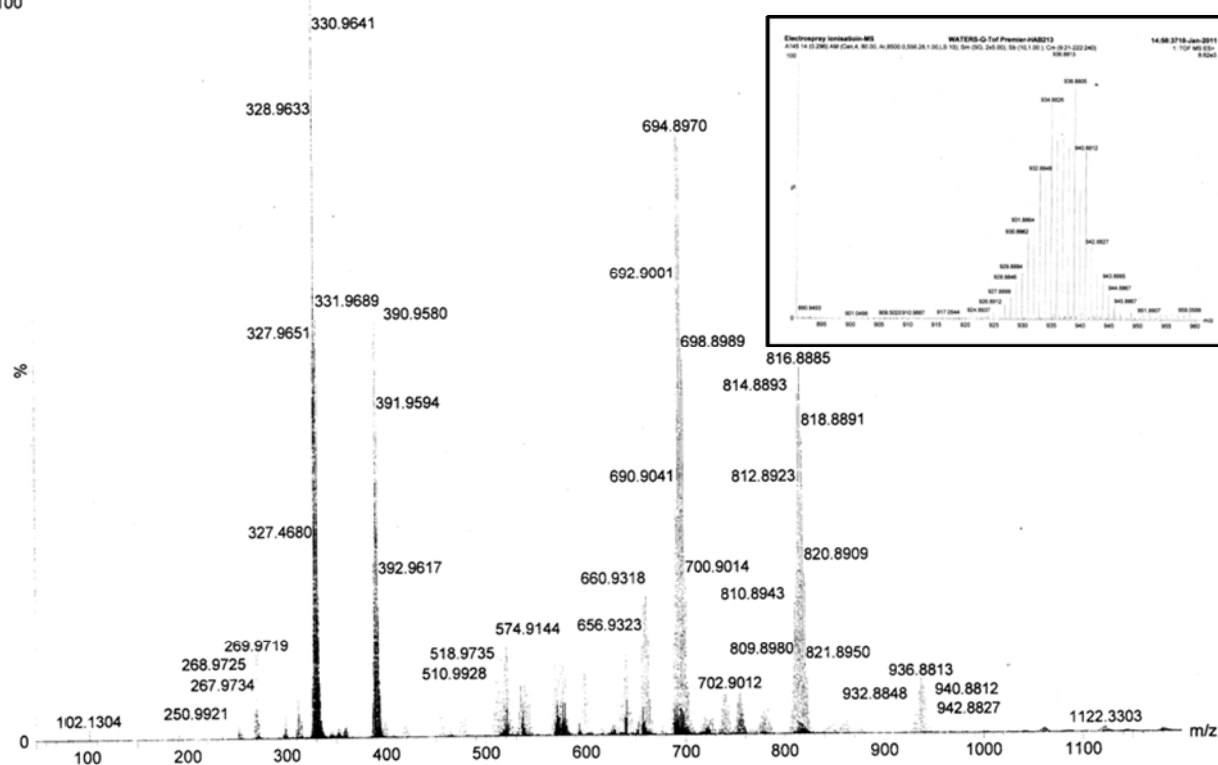

Fig. S16 ES-MS spectrum of 5a (Inset: Expanded portion showing molecular ion peak)

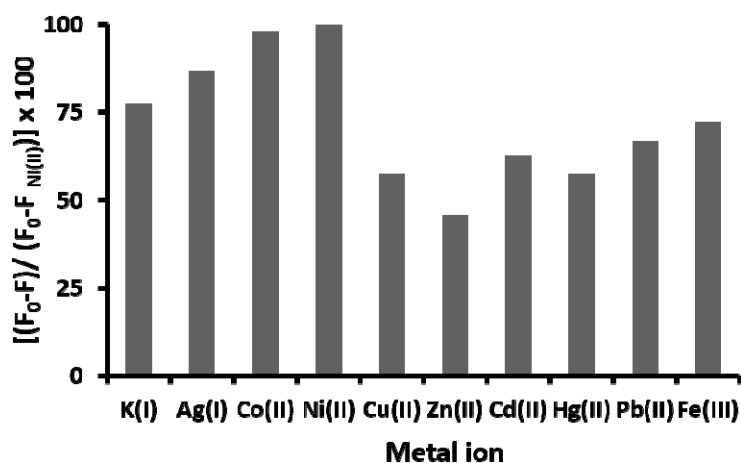

Fig. S17 Change ratio  $\{[(F_0 - F)/(F_0 - F_{Ni(II)})] \times 100\}$  of fluorescence intensity of 'oxo' analogue  $[(C_6H_5OCH_2)_6C_6]$  on addition of 15 equivalents of various tested metal ions with respect to change observed with Ni(II) which exhibited the largest change in fluorescence intensity.

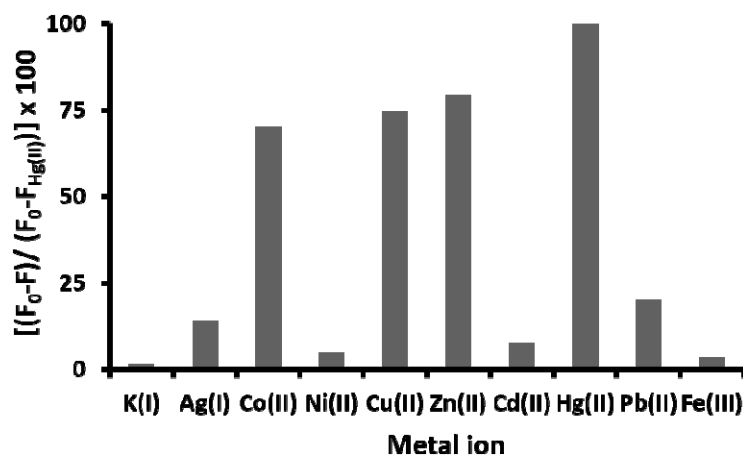

**Fig. S18** Change ratio  $\{[(F_0 - F)/(F_0 - F_{Hg(II)})] \times 100\}$  of fluorescence intensity of ‘seleno’ analogue  $[(C_6H_5SeCH_2)_6C_6]$  on addition of 15 equivalents of various tested metal ions with respect to change observed with Hg(II) which exhibited the largest change in fluorescence intensity.

### Detection limit calculations

The detection limit was calculated using the formula  $(3\sigma/k)$ , where  $\sigma$  is the standard deviation and  $k$  is the slope of fluorescence intensity change with metal ion concentration.

In case of fluorescence changes obtained on addition of  $Cu(NO_3)_2$  solution into species **5a**,

Slope  $k = 20558 \text{ AU}/\mu\text{M} = 2.0558 \times 10^{10} \text{ AU/M}$ .

The Standard Deviation ( $\sigma$ ) was calculated as 50.5

Therefore, detection limit  $= 7.4 \times 10^{-9} \text{ M}$  (7.4 nM).

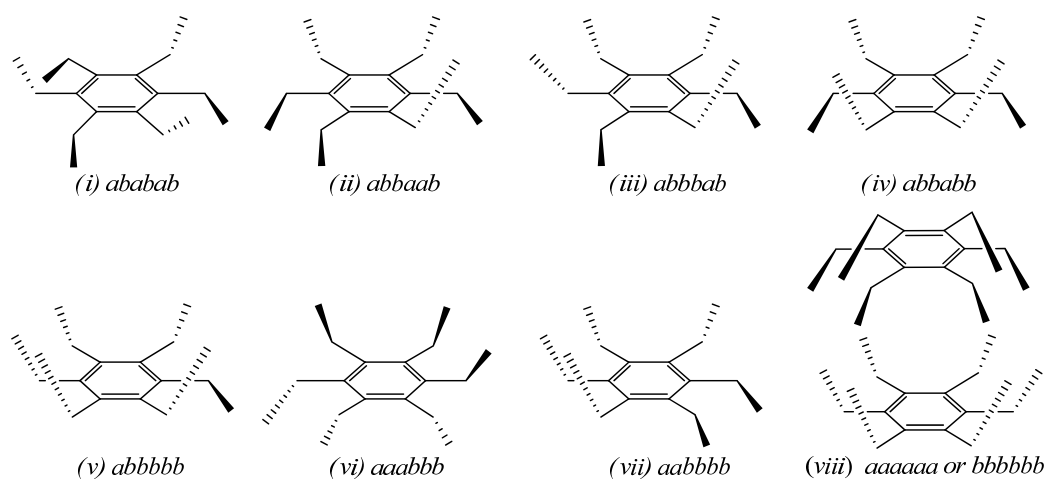

**Chart S1** Various possible conformational isomers of hexa-substituted benzenes.

**Table S1** Crystallographic data and refinement details for compounds **2a** and **3a**.

| Compound                               | <b>2a</b>                 | <b>3a</b>      |
|----------------------------------------|---------------------------|----------------|
| Empirical formula                      | C30 H27 Br1.09 Cl1.91 Se3 | C48 H39 F3 Se6 |
| Formula weight                         | 779.38                    | 1146.55        |
| Temperature                            | 298(2) K                  | 295(2) K       |
| Wavelength                             | 0.71073 Å                 | 0.71073 Å      |
| Crystal system                         | Orthorhombic              | Triclinic      |
| Space group                            | Pnma                      | P -1           |
| a (Å)                                  | 15.970(2)                 | 12.166(4)      |
| b (Å)                                  | 13.690(4)                 | 13.534(4)      |
| c (Å)                                  | 14.857(1)                 | 15.244(4)      |
| $\alpha$ (°)                           | 90                        | 114.409(6)     |
| $\beta$ (°)                            | 90                        | 105.717(6)     |
| $\gamma$ (°)                           | 90                        | 91.805(6)      |
| Z                                      | 4                         | 2              |
| D <sub>calc</sub> (Mg/m <sup>3</sup> ) | 1.594                     | 1.754          |

|                                   |                              |                              |
|-----------------------------------|------------------------------|------------------------------|
| F(000)                            | 1519                         | 1116                         |
| Theta range for data collection   | 1.87 to 28.23°               | 1.54 to 26.37°               |
| Reflections collected             | 36785                        | 12745                        |
| Independent reflections           | 4138                         | 8675                         |
| R(int)                            | 0.0983                       | 0.0482                       |
| Completeness to theta = 25.00°    | 100 %                        | 98.7 %                       |
| Data / restraints / parameters    | 4138 / 222 / 224             | 8675 / 0 / 502               |
| Goodness-of-fit on F <sup>2</sup> | 1.094                        | 0.972                        |
| Final R indices [I>2sigma(I)]     | R1 = 0.0731,<br>wR2 = 0.1267 | R1 = 0.0705,<br>wR2 = 0.1583 |
| R indices (all data)              | R1 = 0.1164,<br>wR2 = 0.1416 | R1 = 0.1532,<br>wR2 = 0.1950 |

---
